# Supplementary material for: Environmental Barriers and Functional Outcomes in Patients with Schizophrenia in Taiwan: The Capacity-Performance Discrepancy
Source: MDPI journal article supplement (doi:10.3390/ijerph19010315), 2021-12-28
Supplement: s1 [file s1]

## Supplementary Materials

### Environmental barriers

The environmental barriers in the Taiwan Data Bank of Persons with Disability and Care Needs from the Social and Family Affairs Administration, Ministry of Health and Welfare, Taiwan (R.O.C.) included e1 product and technology subcategories e110 (products or substances for personal consumption), e115 (products and technology for personal use in daily living), e120 (products and technology for personal indoor and outdoor mobility and transportation), e125 (products and technology for communication), e130 (products and technology for education), and e165 (assets) accessibility. Based on the WHO online browser [1], the questions about accessibility for these categories were as follows: “e110: Did you have any difficulty in getting any natural or human-made object or substance gathered, processed, or manufactured for ingestion including food, drink and drugs?”, “e115: Did you have any difficulty in getting any equipment, products, and technologies used by people in daily activities, including general and assistive products and technology for personal use?”, “e120: Did you have any difficulty in getting any equipment, product,s and technologies used by people in activities of moving inside and outside buildings, including general and assistive products and technology for personal indoor and outdoor mobility and transportation?”, “e125: Did you have any difficulty in getting any equipment, products, and technologies used by people in activities of sending and receiving information, including those adapted or specially designed, located in, on or near the person using them, including general and assistive products and technology for communication?”, “e130: Did you have any difficulty in getting any equipment, products, processes, methods, and technology used for acquisition of knowledge, expertise, or skill, including those adapted or specially designed, including those adapted or specially designed, located in, on or near the person using them, including general and assistive products and technology for education?”, and “e165: Did you have any difficulty in getting any products or objects of economic exchange such as money, goods, property, and other valuables that an individual owns or of which he or she has rights of use, including those adapted or specially designed, located in, on or near the person using them, including tangible and intangible products and goods, financial assets?”

### References:

1. (WHO), W.H.O. *ICF browser*. 2013 [cited 2021 July 15]; Available from: <https://apps.who.int/classifications/icfbrowser/>.

**Table S1.** Logistic regression analysis of potential risk factors associated with having chapter e1 environmental accessibility barriers. \*\*\* $p < 0.001$ , \*\* $p < 0.01$ , \* $p < 0.05$ .

| Environmental barriers                                | e110                      | e115                      | e120                      | e125                      | e130                      | e165                      |
|-------------------------------------------------------|---------------------------|---------------------------|---------------------------|---------------------------|---------------------------|---------------------------|
| C statistic (95% CI)                                  | 0.765***<br>(0.739–0.792) | 0.761***<br>(0.737–0.785) | 0.722***<br>(0.700–0.743) | 0.721***<br>(0.694–0.748) | 0.682***<br>(0.655–0.708) | 0.664***<br>(0.644–0.684) |
| Variables                                             |                           |                           |                           |                           |                           |                           |
| Severe schizophrenia (ref: Moderate schizophrenia)    | 0.88<br>(0.67–1.14)       | 0.92<br>(0.73–1.18)       | 1.03<br>(0.84–1.26)       | 1.29*<br>(1.00–1.67)      | 0.99<br>(0.78–1.25)       | 1.07<br>(0.90–1.27)       |
| Performance score                                     | 1.04***<br>(1.04–1.05)    | 1.04***<br>(1.04–1.05)    | 1.03***<br>(1.03–1.04)    | 1.03***<br>(1.02–1.03)    | 1.03***<br>(1.02–1.03)    | 1.03***<br>(1.02–1.03)    |
| Elderly (ref: 18–64 years)                            | 0.89<br>(0.66–1.19)       | 0.81<br>(0.61–1.07)       | 0.92<br>(0.72–1.16)       | 1.06<br>(0.80–1.42)       | 0.71*<br>(0.53–0.95)      | 0.65***<br>(0.52–0.81)    |
| Female (ref: male)                                    | 1.17<br>(0.92–1.49)       | 1.02<br>(0.82–1.27)       | 1.07<br>(0.89–1.29)       | 0.86<br>(0.68–1.09)       | 0.87<br>(0.70–1.08)       | 0.97<br>(0.83–1.13)       |
| No major caregiver (ref: Yes)                         | 1.07<br>(0.74–1.54)       | 0.92<br>(0.66–1.27)       | 0.79<br>(0.60–1.04)       | 0.86<br>(0.61–1.23)       | 0.83<br>(0.61–1.14)       | 0.89<br>(0.71–1.12)       |
| Lower educational level (ref: Above primary school)   | 1.13<br>(0.89–1.44)       | 1.16<br>(0.93–1.45)       | 1.22*<br>(1.01–1.47)      | 1.24<br>(0.98–1.57)       | 1.08<br>(0.87–1.35)       | 1.02<br>(0.86–1.19)       |
| Institution (ref: Community dwelling)                 | 0.94<br>(0.65–1.36)       | 0.88<br>(0.63–1.24)       | 0.91<br>(0.69–1.20)       | 0.94<br>(0.66–1.35)       | 0.89<br>(0.65–1.23)       | 0.79*<br>(0.63–0.98)      |
| Urbanization level                                    |                           |                           |                           |                           |                           |                           |
| Suburban (ref: Rural)                                 | 1.31<br>(0.99–1.72)       | 1.33*<br>(1.03–1.71)      | 1.07<br>(0.86–1.33)       | 1.82***<br>(1.39–2.40)    | 1.38*<br>(1.08–1.76)      | 1.21*<br>(1.00–1.45)      |
| Urban (ref: Rural)                                    | 1.26<br>(0.93–1.69)       | 1.41*<br>(1.07–1.84)      | 1.14<br>(0.90–1.43)       | 1.65***<br>(1.23–2.22)    | 1.09<br>(0.83–1.43)       | 1.31***<br>(1.08–1.59)    |
| Unemployment (ref: Employment)                        | 1.64<br>(0.59–4.56)       | 1.46<br>(0.63–3.40)       | 2.27*<br>(1.04–4.95)      | 1.47<br>(0.59–3.69)       | 1.14<br>(0.59–2.24)       | 1.29<br>(0.82–2.02)       |
| Middle-low –low family economic status (ref: General) | 1.34*<br>(1.05–1.70)      | 1.03<br>(0.82–1.28)       | 0.93<br>(0.77–1.13)       | 0.95<br>(0.74–1.20)       | 1.16<br>(0.93–1.44)       | 0.96<br>(0.81–1.12)       |

CI: confidence interval.

**Table S2.** The area under curve (AUC), cut-off value, sensitivity, and specificity of ROC analyses

|               | Moderate schizophrenia<br>(n = 2497) | Severe schizophrenia<br>(n = 1385) |
|---------------|--------------------------------------|------------------------------------|
| AUC (95% CI)  |                                      |                                    |
| e110          | 0.786 (0.749–0.824)                  | 0.703 (0.661–0.746)                |
| e115          | 0.774 (0.742–0.807)                  | 0.676 (0.641–0.712)                |
| e120          | 0.733 (0.705–0.762)                  | 0.673 (0.640–0.706)                |
| Cut-off value |                                      |                                    |
| e110          | 40                                   | 55                                 |
| e115          | 34                                   | 55                                 |
| e120          | 34                                   | 55                                 |
| Sensitivity   |                                      |                                    |
| e110          | 0.713                                | 0.694                              |
| e115          | 0.712                                | 0.607                              |
| e120          | 0.708                                | 0.592                              |
| Specificity   |                                      |                                    |
| e110          | 0.752                                | 0.653                              |
| e115          | 0.677                                | 0.666                              |
| e120          | 0.675                                | 0.673                              |

ROC analyses to classify patients with schizophrenia according to the severity of disability experiencing an accessibility barrier to ICF category e110, e115, and e120 by utilizing the standardized summary index scores of performance. CI: confidence interval.

**Table S3.** The comparison of the overall summary index (SI) of performance in patients with moderate schizophrenia without e110, e115, or e120 accessibility barrier and those without any e110, e115, and e120 accessibility barriers

|                                                              | SI of performance (mean±SD) |
|--------------------------------------------------------------|-----------------------------|
| without e110 accessibility barrier (n=2323)                  | 29.4±18.7                   |
| without e110, e115, and e120 accessibility barriers (n=2096) | 28.3±18.4                   |
| <i>p</i> value                                               | 0.05                        |
| without e115 accessibility barrier (n=2282)                  | 29.1±18.6                   |
| without e110, e115, and e120 accessibility barriers (n=2096) | 28.3±18.4                   |

|                                                              |           |
|--------------------------------------------------------------|-----------|
| <i>p</i> value                                               | 0.12      |
| without e120 accessibility barrier (n=2178)                  | 28.8±18.7 |
| without e110, e115, and e120 accessibility barriers (n=2096) | 28.3±18.4 |
| <i>p</i> value                                               | 0.31      |

**Table S4.** The comparison of the overall summary index (SI) of performance in patients with severe schizophrenia without e110, e115, or e120 accessibility barrier and those without any e110, e115, and e120 accessibility barriers

|                                                              | SI of performance (mean±SD) |
|--------------------------------------------------------------|-----------------------------|
| without e110 accessibility barrier (n=1215)                  | 45.8±23.6                   |
| without e110, e115, and e120 accessibility barriers (n=1046) | 44.7±23.3                   |
| <i>p</i> value                                               | 0.26                        |
| without e115 accessibility barrier (n=1182)                  | 45.4±23.6                   |
| without e110, e115, and e120 accessibility barriers (n=1046) | 44.7±23.3                   |
| <i>p</i> value                                               | 0.49                        |
| without e120 accessibility barrier (n=1110)                  | 44.8±23.4                   |
| without e110, e115, and e120 accessibility barriers (n=1046) | 44.7±23.3                   |
| <i>p</i> value                                               | 0.92                        |

**Table S5.** Demographics of the study population and WHODAS 2.0 evaluation results using multiple imputation

|                            | Moderate<br>schizophrenia<br>(n=2845) | Severe<br>schizophrenia<br>(n=1594) | <i>p</i> | Statistics (statistical<br>tests) | Degree of<br>freedom<br>(df) |
|----------------------------|---------------------------------------|-------------------------------------|----------|-----------------------------------|------------------------------|
| Female (n, %)              | 1,330 (46.8)                          | 737 (46.2)                          | 0.743    | 0.108 (chi-squared test)          | 1                            |
| Age (years old, mean [SD]) | 48.6 (14.3)                           | 55.9 (13.4)                         | <0.001   | 17.142 (t-test)                   | 3483.7                       |
| Education                  |                                       |                                     | <0.001   | 89.721 (chi-squared test)         | 1                            |
| >Primary                   | 1,902 (66.9)                          | 836 (52.4)                          |          |                                   |                              |
| ≤Primary                   | 943 (33.2)                            | 758 (47.6)                          |          |                                   |                              |
| Residence                  |                                       |                                     | <0.001   | 373.491 (chi-squared test)        | 1                            |
| Community                  | 1,185 (41.7)                          | 216 (14.5)                          |          |                                   |                              |
| Institution                | 1,660 (58.4)                          | 1,378 (86.5)                        |          |                                   |                              |
| Primary caregiver          |                                       |                                     | <0.001   | 85.178 (chi-squared test)         | 1                            |

|                                 |              |              |        |                           |        |
|---------------------------------|--------------|--------------|--------|---------------------------|--------|
| Yes                             | 892 (31.4)   | 296 (18.6)   |        |                           |        |
| No                              | 1,953 (68.6) | 1,298 (81.4) |        |                           |        |
| Urbanization level              |              |              | 0.005  | 10.490 (chi-squared test) | 2      |
| Rural                           | 639 (22.5)   | 427 (26.8)   |        |                           |        |
| Suburban                        | 793 (27.9)   | 421 (26.4)   |        |                           |        |
| Urban                           | 1,413 (49.7) | 746 (46.5)   |        |                           |        |
| Work status                     |              |              | <0.001 | 82.982 (chi-squared test) | 1      |
| Employment                      | 172 (6.1)    | 7 (0.4)      |        |                           |        |
| Unemployment                    | 2,673 (94.0) | 1,587 (99.6) |        |                           |        |
| Family economic status          |              |              | <0.001 | 53.286 (chi-squared test) | 1      |
| General                         | 1,650 (58.0) | 743 (46.6)   |        |                           |        |
| Middle low–low                  | 1,195 (42.0) | 851 (53.4)   |        |                           |        |
| WHODAS 2.0 (mean [SD])          |              |              |        |                           |        |
| Cognition (domain 1)            |              |              |        |                           |        |
| Capacity                        | 38.4 (25.5)  | 59.9 (28.6)  | <0.001 | 24.918 (t-test)           | 2991   |
| Performance                     | 36.3 (24.6)  | 57.5 (28.5)  | <0.001 | 24.847 (t-test)           | 2913   |
| Mobility (domain 2)             |              |              |        |                           |        |
| Capacity                        | 20.4 (28.6)  | 39.9 (36.8)  | <0.001 | 18.343 (t-test)           | 2684.5 |
| Performance                     | 17.7 (25.2)  | 34.7 (33.2)  | <0.001 | 17.802 (t-test)           | 2633.6 |
| Self-care (domain 3)            |              |              |        |                           |        |
| Capacity                        | 19.0 (25.8)  | 41.5 (34.3)  | <0.001 | 22.744 (t-test)           | 2614.1 |
| Performance                     | 14.7 (21.2)  | 31.1 (21.2)  | <0.001 | 19.009 (t-test)           | 2464.7 |
| Getting along (domain 4)        |              |              |        |                           |        |
| Capacity                        | 40.0 (25.6)  | 55.9 (28.8)  | <0.001 | 18.357 (t-test)           | 2985.4 |
| Performance                     | 39.1 (25.2)  | 54.4 (28.7)  | <0.001 | 17.794 (t-test)           | 2956.3 |
| Life activities (domain 5-1)    |              |              |        |                           |        |
| Capacity                        | 44.2 (33.2)  | 65.3 (37.4)  | <0.001 | 18.793 (t-test)           | 2985.1 |
| Performance                     | 40.6 (32.6)  | 60.3 (38.5)  | <0.001 | 17.282 (t-test)           | 2873.7 |
| Social participation (domain 6) |              |              |        |                           |        |
| Capacity                        | 36.5 (23.3)  | 48.5 (26.6)  | <0.001 | 13.871 (t-test)           | 2913.4 |
| Performance                     | 34.5 (22.1)  | 45.1 (25.7)  | <0.001 | 15.143 (t-test)           | 2951.3 |
| Overall summary index (SI)      |              |              |        |                           |        |
| Capacity                        | 33.5 (21.7)  | 51.5 (25.3)  | <0.001 | 22.910 (t-test)           | 2825.1 |
| Performance                     | 31.1 (20.0)  | 47.3 (24.1)  | <0.001 | 23.960 (t-test)           | 2899   |
| Chapter e1                      | 837 (29.4)   | 596 (37.4)   | <0.001 | 29.686 (chi-squared test) | 1      |
| Category e110                   | 202 (7.1)    | 172 (12.1)   | <0.001 | 30.887 (chi-squared test) | 1      |
| Category e115                   | 246 (8.7)    | 231 (14.5)   | <0.001 | 36.392 (chi-squared test) | 1      |

|               |            |            |        |                           |   |
|---------------|------------|------------|--------|---------------------------|---|
| Category e120 | 363 (12.8) | 326 (20.5) | <0.001 | 46.104 (chi-squared test) | 1 |
| Category e125 | 198 (7.0)  | 204 (12.8) | <0.001 | 42.283 (chi-squared test) | 1 |
| Category e130 | 264 (9.3)  | 207 (13.0) | <0.001 | 14.800 (chi-squared test) | 1 |
| Category e165 | 599 (21.1) | 446 (28.0) | <0.001 | 27.222 (chi-squared test) | 1 |

**Table S6.** The sociodemographic allocation and comparison of the patients with schizophrenia without and with accessibility barriers in the categories of chapter e1 products and technology with multiple imputation

| Parameters        | e110 without<br>accessibility<br>barrier | e110 with<br>accessibility<br>barrier | <i>p</i> | e115 without<br>accessibility<br>barrier | e115 with<br>accessibility<br>barrier | <i>p</i> | e120 without<br>accessibility<br>barrier | e120 with<br>accessibility<br>barrier | <i>p</i> |
|-------------------|------------------------------------------|---------------------------------------|----------|------------------------------------------|---------------------------------------|----------|------------------------------------------|---------------------------------------|----------|
| Total             | 4,045 (91.1)                             | 394 (8.9)                             |          | 3,962 (89.3)                             | 477 (10.8)                            |          | 3,750 (84.5)                             | 689 (15.5)                            |          |
| Age groups        |                                          |                                       | <0.001   |                                          |                                       | 0.008    |                                          |                                       | <0.001   |
| 18-64 years       | 3,359 (83.0)                             | 298 (75.6)                            |          | 3,285 (82.9)                             | 372 (78.0)                            |          | 3,125 (83.3)                             | 532 (77.2)                            |          |
| ≥65 years         | 686 (17.0)                               | 96 (24.4)                             |          | 677 (17.1)                               | 105 (22.0)                            |          | 625 (16.7)                               | 157 (22.8)                            |          |
| Impairment        |                                          |                                       | <0.001   |                                          |                                       | <0.001   |                                          |                                       | <0.001   |
| Moderate          | 2,643 (65.3)                             | 202 (51.3)                            |          | 2,599 (65.6)                             | 246 (51.6)                            |          | 2,482 (66.2)                             | 363 (52.7)                            |          |
| Severe            | 1,402 (34.7)                             | 192 (48.7)                            |          | 1,363 (34.4)                             | 231 (48.4)                            |          | 1,268 (33.8)                             | 326 (47.3)                            |          |
| Sex               |                                          |                                       | 0.030    |                                          |                                       | 0.337    |                                          |                                       | 0.094    |
| Male              | 2,182 (53.9)                             | 190 (48.2)                            |          | 2,127 (53.7)                             | 245 (51.4)                            |          | 2,024 (54.0)                             | 348 (50.5)                            |          |
| Female            | 1,863 (46.1)                             | 204 (51.8)                            |          | 1,835 (46.3)                             | 232 (48.6)                            |          | 1,726 (46.0)                             | 341 (49.5)                            |          |
| Primary caregiver |                                          |                                       | 0.085    |                                          |                                       | 0.856    |                                          |                                       | 0.369    |
| Yes               | 1,097 (27.1)                             | 91 (23.1)                             |          | 1,062 (26.8)                             | 126 (26.4)                            |          | 994 (26.5)                               | 194 (28.2)                            |          |
| No                | 2,948 (72.9)                             | 303 (76.9)                            |          | 2,900 (73.2)                             | 351 (73.6)                            |          | 2,756 (73.5)                             | 495 (71.8)                            |          |
| Education         |                                          |                                       | <0.001   |                                          |                                       | <0.001   |                                          |                                       | <0.001   |
| >Primary          | 2,533 (62.6)                             | 205 (52.0)                            |          | 2,482 (62.7)                             | 256 (53.7)                            |          | 2,364 (63.0)                             | 374 (54.3)                            |          |
| ≤Primary          | 1,512 (37.4)                             | 189 (48.0)                            |          | 1,480 (37.4)                             | 221 (46.3)                            |          | 1,386 (37.0)                             | 315 (45.7)                            |          |
| Residence         |                                          |                                       | 0.003    |                                          |                                       | 0.032    |                                          |                                       | 0.045    |
| Community         | 1,303 (32.2)                             | 98 (24.9)                             |          | 1,271 (32.1)                             | 130 (27.2)                            |          | 1,206 (32.2)                             | 195 (28.3)                            |          |
| Institution       | 2,742 (67.8)                             | 296 (75.1)                            |          | 2,691 (67.9)                             | 347 (72.8)                            |          | 2,544 (67.8)                             | 494 (71.7)                            |          |

|                        |              |            |        |              |            |              |            |
|------------------------|--------------|------------|--------|--------------|------------|--------------|------------|
| Urbanization level     |              |            | 0.031  |              | 0.008      |              | 0.272      |
| Rural                  | 963 (23.8)   | 103 (26.1) |        | 934 (23.6)   | 132 (27.7) | 889 (23.7)   | 177 (25.7) |
| Suburban               | 1,090 (27.0) | 124 (31.5) |        | 1,069 (27.0) | 145 (30.4) | 1,018 (27.2) | 196 (28.5) |
| Urban                  | 1,992 (49.3) | 167 (42.4) |        | 1,959 (49.4) | 200 (41.9) | 1,843 (49.2) | 316 (45.9) |
| Work status            |              |            | 0.004  |              | 0.003      |              | <0.001     |
| Employed               | 174 (4.3)    | 5 (1.3)    |        | 172 (4.3)    | 7 (1.5)    | 169 (4.5)    | 10 (1.4)   |
| Unemployed             | 3,871 (95.7) | 389 (98.7) |        | 3,790 (95.7) | 470 (98.5) | 3,581 (95.5) | 679 (98.6) |
| Family economic status |              |            | <0.001 |              | 0.063      |              | 0.593      |
| General                | 2,212 (54.7) | 181 (45.9) |        | 2,155 (54.4) | 238 (49.9) | 2,028 (54.1) | 365 (53.0) |
| Middle low–Low         | 1,833 (45.3) | 213 (54.1) |        | 1,807 (45.6) | 239 (50.1) | 1,722 (45.)  | 324 (47.0) |

**Table S7.** Comparison of relative difference (RD, capacity-performance discrepancy) of the summary index (SI) between schizophrenia patients with and without accessibility barriers to the categories in chapter e1 products and technology with multiple imputation, including environmental categories e110 for personal consumption, e115 for personal usage in activities of daily living, and e120 for personal outdoor and indoor mobility and transportation, stratified by patients with moderate schizophrenia (n = 202 in accessibility of e110 with barrier, n = 246 in accessibility of e115 with barrier, n = 363 in accessibility of e120 with barrier) and severe schizophrenia (n = 192 in accessibility of e110 with barrier, n = 231 in accessibility of e115 with barrier, n = 326 in accessibility of e120 with barrier).

|                       | <b>Moderate schizophrenia (n=2845)</b> | <b>Severe schizophrenia (n=1594)</b> |
|-----------------------|----------------------------------------|--------------------------------------|
| Accessibility of e110 |                                        |                                      |
| with barrier          | 0** (0–10.28)                          | 0 (0–9.14)                           |
| without barrier       | 0** (0–4.26)                           | 0 (0–10.31)                          |
| Accessibility of e115 |                                        |                                      |
| with barrier          | 0** (0–10.47)                          | 0 (0–8.44)                           |
| without barrier       | 0** (0–4.29)                           | 0 (0–10.46)                          |
| Accessibility of e120 |                                        |                                      |
| with barrier          | 0** (0–11.88)                          | 0 (0–9.60)                           |
| without barrier       | 0** (0–3.34)                           | 0 (0–10.27)                          |

**Table S8.** The area under the curve (AUC), cut-off value, sensitivity, and specificity of ROC analyses with multiple imputation

|               | <b>Moderate schizophrenia (n=2845)</b> | <b>Severe schizophrenia (n=1594)</b> |
|---------------|----------------------------------------|--------------------------------------|
| AUC (95% CI)  |                                        |                                      |
| e110          | 0.778 (0.742–0.814)                    | 0.692 (0.651–0.732)                  |
| e115          | 0.774 (0.743–0.804)                    | 0.695 (0.659–0.731)                  |
| e120          | 0.733 (0.706–0.760)                    | 0.673 (0.640–0.706)                  |
| Cut-off value |                                        |                                      |
| e110          | 40                                     | 52                                   |
| e115          | 35                                     | 52                                   |
| e120          | 34                                     | 56                                   |
| Sensitivity   |                                        |                                      |
| e110          | 0.713                                  | 0.719                                |
| e115          | 0.724                                  | 0.706                                |
| e120          | 0.708                                  | 0.580                                |
| Specificity   |                                        |                                      |
| e110          | 0.750                                  | 0.608                                |
| e115          | 0.686                                  | 0.616                                |
| e120          | 0.675                                  | 0.689                                |



**Table S9.** The area under curve (AUC), cut-off value, sensitivity, and specificity of ROC analyses after stratification by sex (male and female) and age (18-64 years and  $\geq 65$  years)

|               | Male                            |                              |                                |                              | Female                         |                              |                                |                              |
|---------------|---------------------------------|------------------------------|--------------------------------|------------------------------|--------------------------------|------------------------------|--------------------------------|------------------------------|
|               | 18-64                           |                              | $\geq 65$                      |                              | 18-64                          |                              | $\geq 65$                      |                              |
|               | Moderate schizophrenia (n=1192) | Severe schizophrenia (n=601) | Moderate schizophrenia (n=126) | Severe schizophrenia (n=147) | Moderate schizophrenia (n=981) | Severe schizophrenia (n=420) | Moderate schizophrenia (n=198) | Severe schizophrenia (n=217) |
| AUC (95% CI)  |                                 |                              |                                |                              |                                |                              |                                |                              |
| e110          | 0.820<br>(0.767–0.873)          | 0.708<br>(0.641–0.776)       | 0.820<br>(0.664–0.976)         | 0.586<br>(0.427–0.745)       | 0.759<br>(0.696–0.821)         | 0.736<br>(0.658–0.813)       | 0.729<br>(0.612–0.845)         | 0.686<br>(0.594–0.777)       |
| e115          | 0.796<br>(0.747–0.846)          | 0.693<br>(0.636–0.751)       | 0.647<br>(0.442–0.853)         | 0.658<br>(0.537–0.778)       | 0.787<br>(0.738–0.836)         | 0.733<br>(0.661–0.805)       | 0.650<br>(0.541–0.759)         | 0.711<br>(0.624–0.798)       |
| e120          | 0.750<br>(0.707–0.793)          | 0.666<br>(0.611–0.721)       | 0.697<br>(0.557–0.838)         | 0.572<br>(0.456–0.689)       | 0.734<br>(0.689–0.780)         | 0.718<br>(0.655–0.782)       | 0.607<br>(0.515–0.670)         | 0.670<br>(0.584–0.756)       |
| Cut-off value |                                 |                              |                                |                              |                                |                              |                                |                              |
| e110          | 40                              | 52                           | 68                             | 57                           | 39                             | 51                           | 49                             | 63                           |
| e115          | 35                              | 52                           | 35                             | 57                           | 30                             | 55                           | 49                             | 64                           |
| e120          | 34                              | 56                           | 35                             | 57                           | 33                             | 65                           | 46                             | 63                           |
| Sensitivity   |                                 |                              |                                |                              |                                |                              |                                |                              |
| e110          | 0.750                           | 0.746                        | 0.714                          | 0.706                        | 0.657                          | 0.761                        | 0.810                          | 0.700                        |
| e115          | 0.753                           | 0.682                        | 0.636                          | 0.833                        | 0.813                          | 0.741                        | 0.667                          | 0.667                        |
| e120          | 0.697                           | 0.535                        | 0.765                          | 0.645                        | 0.697                          | 0.517                        | 0.579                          | 0.623                        |
| Specificity   |                                 |                              |                                |                              |                                |                              |                                |                              |
| e110          | 0.792                           | 0.657                        | 0.908                          | 0.523                        | 0.764                          | 0.626                        | 0.644                          | 0.661                        |
| e115          | 0.729                           | 0.663                        | 0.530                          | 0.543                        | 0.618                          | 0.635                        | 0.637                          | 0.691                        |
| e120          | 0.707                           | 0.739                        | 0.560                          | 0.534                        | 0.696                          | 0.835                        | 0.613                          | 0.665                        |

**Table S10.** Comparison of relative difference (RD, capacity-performance discrepancy) of the summary index (SI) between schizophrenia patients with and without accessibility barriers to the categories in chapter e1 products and technology, including environmental categories e110 for personal consumption, e115 for personal usage in activities of daily living, and e120 for personal outdoor and indoor mobility and transportation, stratified by patients with moderate schizophrenia and severe schizophrenia and sex and age.

|                       |       |                 | Moderate schizophrenia |              | Severe schizophrenia |             |
|-----------------------|-------|-----------------|------------------------|--------------|----------------------|-------------|
|                       |       |                 | N                      | RD           | N                    | RD          |
| Accessibility of e110 |       |                 |                        |              |                      |             |
| Male                  | 18-64 | with barrier    | 76                     | 0** (0–8.79) | 67                   | 0 (0–10.01) |
|                       |       | without barrier | 1116                   | 0** (0–0)    | 534                  | 0 (0–8.01)  |
|                       | 65+   | with barrier    | 7                      | 0 (0–7.05)   | 17                   | 0 (0–2.44)  |

|                       |       |                       |                |                   |             |                |
|-----------------------|-------|-----------------------|----------------|-------------------|-------------|----------------|
| Female                | 18-64 | without barrier       | 119            | 0 (0–11.93)       | 130         | 0 (0–14.33)    |
|                       |       | with barrier          | 70             | 0** (0–12.32)     | 46          | 0 (0–8.54)     |
|                       | 65+   | without barrier       | 911            | 0** (0–2.51)      | 374         | 0 (0–10.89)    |
|                       |       | with barrier          | 21             | 0 (0–5.67)        | 40          | 4.34 (0–12.49) |
|                       |       | without barrier       | 177            | 3.04 (0–16.70)    | 177         | 5.72 (0–15.03) |
| Accessibility of e115 |       |                       |                |                   |             |                |
| Male                  | 18-64 | with barrier          | 97             | 0*** (0–9.43)     | 88          | 0 (0–10.32)    |
|                       |       | without barrier       | 1095           | 0*** (0–0)        | 513         | 0 (0–8.01)     |
|                       | 65+   | with barrier          | 11             | 0 (0–11.93)       | 18          | 0.62 (0–4.69)  |
| without barrier       |       | 115                   | 0 (0–11.65)    | 129               | 0 (0–13.23) |                |
| Female                | 18-64 | with barrier          | 80             | 0* (0–9.35)       | 58          | 1.12 (0–9.60)  |
|                       |       | without barrier       | 901            | 0* (0–2.86)       | 362         | 0 (0–10.83)    |
|                       | 65+   | with barrier          | 27             | 0 (0–9.53)        | 39          | 4.06 (0–11.12) |
|                       |       | without barrier       | 171            | 3.04 (0–16.70)    | 178         | 5.75 (0–15.82) |
|                       |       | Accessibility of e120 |                |                   |             |                |
| Male                  | 18-64 | with barrier          | 142            | 0*** (0–11.50)    | 114         | 0 (0–10.01)    |
|                       |       | without barrier       | 1050           | 0*** (0–0)        | 487         | 0 (0–7.86)     |
|                       | 65+   | with barrier          | 17             | 0*** (0–11.93)    | 31          | 0 (0–5.34)     |
| without barrier       |       | 109                   | 0*** (0–11.34) | 116               | 0 (0–14.40) |                |
| Female                | 18-64 | with barrier          | 122            | 0 (0–9.70)        | 87          | 0 (0–7.25)     |
|                       |       | without barrier       | 859            | 0 (0–1.52)        | 333         | 0 (0–11.12)    |
|                       | 65+   | with barrier          | 38             | 0*** (0–15.41)    | 53          | 5.78 (0–13.20) |
|                       |       | without barrier       | 160            | 2.84*** (0–15.29) | 164         | 5.33 (0–15.06) |

**Table S11.** The factors with substantial difference in relative difference (RD, capacity-performance discrepancy) in patients with severe schizophrenia and e120 accessibility barrier (n = 285). Median (interquartile range [IQR]).

| Severe schizophrenia and e120 accessibility barrier (+) | Median (IQR)   | Median (IQR)  | <i>P</i> <sup>†</sup> |
|---------------------------------------------------------|----------------|---------------|-----------------------|
| 18-64 years vs ≥65 years                                | 0 (0–8.63)     | 3.50 (0–9.87) | 0.048*                |
| Male vs female                                          | 0 (0–8.34)     | 1.14 (0–9.62) | 0.254                 |
| Above primary school vs Lower education level           | 0 (0–9.85)     | 0.55 (0–8.91) | 0.978                 |
| Major caregiver Yes vs No                               | 4.81 (0–12.69) | 0 (0–8.34)    | 0.033*                |
| Community vs Institution                                | 5.14 (0–12.69) | 0 (0–8.39)    | 0.030*                |
| Rural areas vs Suburban areas                           | 1.11 (0–8.97)  | 0 (0–9.22)    | 0.787                 |
| Rural areas vs Urban areas                              | 1.11 (0–8.97)  | 0 (0–9.60)    | 0.477                 |
| General vs Middle low –low family economic status       | 1.10 (0–9.85)  | 0 (0–8.44)    | 0.153                 |

\**P* < 0.05.

<sup>†</sup>Mann–Whitney U test or Kruskal-Wallis test.

<sup>‡</sup>The results of the comparison between employment and unemployment are not shown because there was only one patient in the employed group.

STROBE Statement—Checklist of items that should be included in reports of *cross-sectional studies*

|                              | Item No | Recommendation                                                                                                                                                                                               |                |
|------------------------------|---------|--------------------------------------------------------------------------------------------------------------------------------------------------------------------------------------------------------------|----------------|
| Title and abstract           | 1       | (a) Indicate the study’s design with a commonly used term in the title or the abstract                                                                                                                       | Page 1         |
|                              |         | (b) Provide in the abstract an informative and balanced summary of what was done and what was found                                                                                                          | Page 1         |
| Introduction                 |         |                                                                                                                                                                                                              |                |
| Background/rationale         | 2       | Explain the scientific background and rationale for the investigation being reported                                                                                                                         | Page 1         |
| Objectives                   | 3       | State specific objectives, including any prespecified hypotheses                                                                                                                                             | Page 2         |
| Methods                      |         |                                                                                                                                                                                                              |                |
| Study design                 | 4       | Present key elements of study design early in the paper                                                                                                                                                      | Pages 3-4      |
| Setting                      | 5       | Describe the setting, locations, and relevant dates, including periods of recruitment, exposure, follow-up, and data collection                                                                              | Pages 3-4      |
| Participants                 | 6       | (a) Give the eligibility criteria, and the sources and methods of selection of participants                                                                                                                  | Pages 3-4      |
| Variables                    | 7       | Clearly define all outcomes, exposures, predictors, potential confounders, and effect modifiers. Give diagnostic criteria, if applicable                                                                     | Pages 3-4      |
| Data sources/<br>measurement | 8*      | For each variable of interest, give sources of data and details of methods of assessment (measurement). Describe comparability of assessment methods if there is more than one group                         | Pages 3-4      |
| Bias                         | 9       | Describe any efforts to address potential sources of bias                                                                                                                                                    | Page 12        |
| Study size                   | 10      | Explain how the study size was arrived at                                                                                                                                                                    | Pages 4-5      |
| Quantitative variables       | 11      | Explain how quantitative variables were handled in the analyses. If applicable, describe which groupings were chosen and why                                                                                 | Pages 3-4      |
| Statistical methods          | 12      | (a) Describe all statistical methods, including those used to control for confounding                                                                                                                        | Pages 4-5      |
|                              |         | (b) Describe any methods used to examine subgroups and interactions                                                                                                                                          | Pages 4-5, 12  |
|                              |         | (c) Explain how missing data were addressed                                                                                                                                                                  | Page 12        |
|                              |         | (d) If applicable, describe analytical methods taking account of sampling strategy                                                                                                                           | N/A            |
|                              |         | (e) Describe any sensitivity analyses                                                                                                                                                                        | Page 12        |
| Results                      |         |                                                                                                                                                                                                              |                |
| Participants                 | 13*     | (a) Report numbers of individuals at each stage of study—eg numbers potentially eligible, examined for eligibility, confirmed eligible, included in the study, completing follow-up, and analysed            | Pages 6-7      |
|                              |         | (b) Give reasons for non-participation at each stage                                                                                                                                                         | Page 6         |
|                              |         | (c) Consider use of a flow diagram                                                                                                                                                                           | Page 6         |
| Descriptive data             | 14*     | (a) Give characteristics of study participants (eg demographic, clinical, social) and information on exposures and potential confounders                                                                     | Page 6         |
|                              |         | (b) Indicate number of participants with missing data for each variable of interest                                                                                                                          | Page 6         |
| Outcome data                 | 15*     | Report numbers of outcome events or summary measures                                                                                                                                                         | Pages 6-11     |
| Main results                 | 16      | (a) Give unadjusted estimates and, if applicable, confounder-adjusted estimates and their precision (eg, 95% confidence interval). Make clear which confounders were adjusted for and why they were included | Pages 8, 11-12 |
|                              |         | (b) Report category boundaries when continuous variables were categorized                                                                                                                                    | Pages 8-10     |

|                          |    |                                                                                                                                                                            |             |
|--------------------------|----|----------------------------------------------------------------------------------------------------------------------------------------------------------------------------|-------------|
|                          |    | (c) If relevant, consider translating estimates of relative risk into absolute risk for a meaningful time period                                                           | N/A         |
| Other analyses           | 17 | Report other analyses done—eg analyses of subgroups and interactions, and sensitivity analyses                                                                             | Page 12     |
| <b>Discussion</b>        |    |                                                                                                                                                                            |             |
| Key results              | 18 | Summarise key results with reference to study objectives                                                                                                                   | Pages 12-13 |
| Limitations              | 19 | Discuss limitations of the study, taking into account sources of potential bias or imprecision. Discuss both direction and magnitude of any potential bias                 | Page 14     |
| Interpretation           | 20 | Give a cautious overall interpretation of results considering objectives, limitations, multiplicity of analyses, results from similar studies, and other relevant evidence | Pages 12-14 |
| Generalisability         | 21 | Discuss the generalisability (external validity) of the study results                                                                                                      | Page 14     |
| <b>Other information</b> |    |                                                                                                                                                                            |             |
| Funding                  | 22 | Give the source of funding and the role of the funders for the present study and, if applicable, for the original study on which the present article is based              | Page 15     |

\*Give information separately for exposed and unexposed groups.

**Note:** An Explanation and Elaboration article discusses each checklist item and gives methodological background and published examples of transparent reporting. The STROBE checklist is best used in conjunction with this article (freely available on the Web sites of PLoS Medicine at <http://www.plosmedicine.org/>, Annals of Internal Medicine at <http://www.annals.org/>, and Epidemiology at <http://www.epidem.com/>). Information on the STROBE Initiative is available at [www.strobe-statement.org](http://www.strobe-statement.org).
